# Supplementary material
Source: PubMed Central journal article supplement (PMC7521759)
Supplement: NIHMS1592456-supplement-SI.pdf [file NIHMS1592456-supplement-SI.pdf]

# Supporting Information

## Centrifugation-assisted Immiscible Fluid Filtration (CIFF) for dual-bioanalyte extraction

Duane S. Juang,<sup>†</sup> Scott M. Berry,<sup>†</sup> Chao Li,<sup>†</sup> Joshua M. Lang,<sup>\*,‡</sup> & David J. Beebe<sup>\*,†</sup>

<sup>†</sup> Department of Biomedical Engineering, University of Wisconsin-Madison, Madison, WI, USA

<sup>‡</sup> Department of Medicine, Wisconsin Institutes for Medical Research, University of Wisconsin-Madison, Madison, WI, USA

\*Corresponding authors: [djeebe@wisc.edu](mailto:djeebe@wisc.edu), [jmlang@medicine.wisc.edu](mailto:jmlang@medicine.wisc.edu)

### Table of contents:

|                                                                                                                           |     |
|---------------------------------------------------------------------------------------------------------------------------|-----|
| Derivation of physics governing the conditions of bead jump in CIFF .....                                                 | S-2 |
| Figure S1. Physical variables governing bead jump in CIFF .....                                                           | S-2 |
| Figure S2. DNA extraction efficiency of CIFF compared to a traditional column-based technique for low input samples ..... | S-4 |
| Figure S3. Inhibition of reverse transcription and quantitative PCR reactions by mRNA Lysis/Binding buffer .....          | S-4 |
| Figure S4. Comparison of operation workflow of CIFF, column-based extraction, and magnetic bead-based extraction .....    | S-5 |
| References .....                                                                                                          | S-5 |

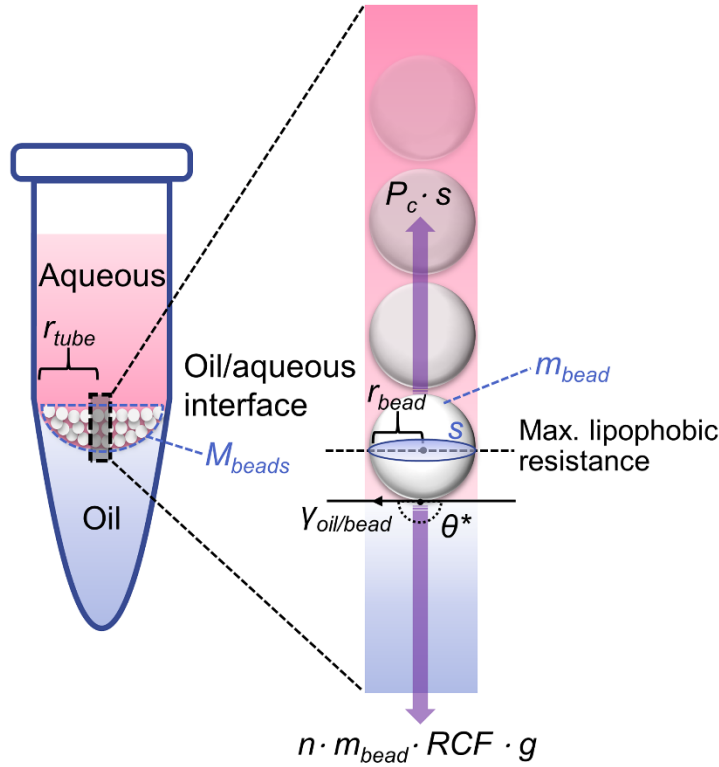

**Figure S1.** physical variables governing bead jump in CIFF.

The physics governing the conditions of bead jump in CIFF can be written as:

$$n \cdot m_{bead} \cdot RCF \cdot g = P_c \cdot s \quad (\text{equation 1})$$

where  $n$  is the stacking coefficient estimated as  $N_{total}/N_{per\ layer}$  on average,  $N_{total}$  is the total number of beads in the tube,  $N_{per\ layer}$  is the number of beads in the largest circle in the bead pellet, which is  $N_{per\ layer} = (r_{tube}/r_{bead})^2$ , where  $r_{tube}$  is the radius of the centrifugal tube, and  $r_{bead}$  is the radius of a bead.  $m_{bead}$  is the mass of a single bead,  $RCF$  is the relative centrifugal force (a dimensionless unit defined as the ratio of centrifugal acceleration over gravitational acceleration ( $g$ ) at the Earth's surface),  $s$  is the projected area of a single bead at the oil/aqueous interface equal to  $\pi r_{bead}^2$ ,  $P_c$  is the capillary pressure (lipophobic resistance) applied on a single bead from the oil phase which is equal to  $2\gamma_{oil/bead} \cdot \cos\theta/r_{bead}$ .  $\theta = \pi - \theta^*$  and  $\theta^*$  is Young's contact angle of the fluorinated oil (FC-3283) on the bead (*i.e.*, glass) surface under water estimated from our previous work,<sup>1</sup> and  $\gamma_{oil/bead}$  is the oil-bead interfacial tension.

$$\frac{N_{total}}{N_{per\ layer}} \cdot m_{bead} \cdot RCF \cdot g = 2 \frac{\gamma_{oil/bead} \cdot \cos\theta}{r_{bead}} \cdot \pi r_{bead}^2 \quad (equation\ 2)$$

$$\left(\frac{N_{total}}{(r_{tube}/r_{bead})^2}\right) \cdot m_{bead} \cdot RCF \cdot g = 2 \frac{\gamma_{oil/bead} \cdot \cos\theta}{r_{bead}} \cdot \pi r_{bead}^2 \quad (equation\ 3)$$

Here we define  $M_{beads} = N_{total} \cdot m_{bead}$

$$M_{beads} \cdot RCF = 2 \frac{\gamma_{oil/bead} \cdot \cos\theta}{r_{bead}} \cdot \pi r_{bead}^2 \cdot (r_{tube}/r_{bead})^2 / g \approx 12000 \cdot mg \quad (equation\ 4)$$

Solving for *equation 4* using constants that represent the actual values or measured values from a previous work,<sup>1</sup> including  $r_{tube} = 2500 \mu\text{m}$ ,  $r_{bead} = 20 \mu\text{m}$ ,  $\gamma_{oil/bead} = 59.0 \text{ mN/m}$ ,<sup>1</sup>  $\theta^* = 180^\circ$ , and  $g = 9.807 \text{ m/s}^2$ , gives

$$RCF \approx 12000/M_{beads} \quad (equation\ 5)$$

By plotting *equation 5* with  $M_{beads}$  as the x axis and  $RCF$  as the y axis yields the predicted curve shown in Figure 2 of the main text.

Thus, for a given oil/aqueous pair, physical characteristics of bead and centrifugal tube, more beads are added to the tube would result in a larger  $M_{beads}$ , and hence a smaller centrifugal force (or  $RCF$ ) would be needed to cause the jumping of beads. It is worth noting that a variance of  $n$  (the stacking coefficient) across the oil/aqueous meniscus (*i.e.*, larger towards the center and smaller towards the edge) will be seen, especially in cases of smaller  $M_{beads}$ . The smaller the  $n$ , the higher the required  $RCF$ . In our prediction (*equation 1*),  $n$  is estimated as an average across the bead pellet, so the predicted  $RCF$  is actually smaller than the measured value and the discrepancy between prediction and experiment becomes more noticeable when  $M_{beads}$  becomes smaller (Figure 2B). This also explains the trend seen in Figure 2C where smaller  $M_{beads}$  values are associated with a higher percentage of residual beads.

As can be seen in *equation 4*, a more hydrophilic (or lipophobic) surface of beads would result in a larger  $\gamma_{oil/bead}$  and thus an increased resistance retaining the beads in the aqueous phase. On the other hand, a smaller  $\gamma_{oil/bead}$  which can be achieved for example by adding surfactant to the aqueous phase will allow the jumping of beads to occur much more easily. Similarly, if a tube with a smaller  $r_{tube}$  is used, for a given  $M_{beads}$ , a smaller centrifugal force (or  $RCF$ ) for bead jump can be expected.

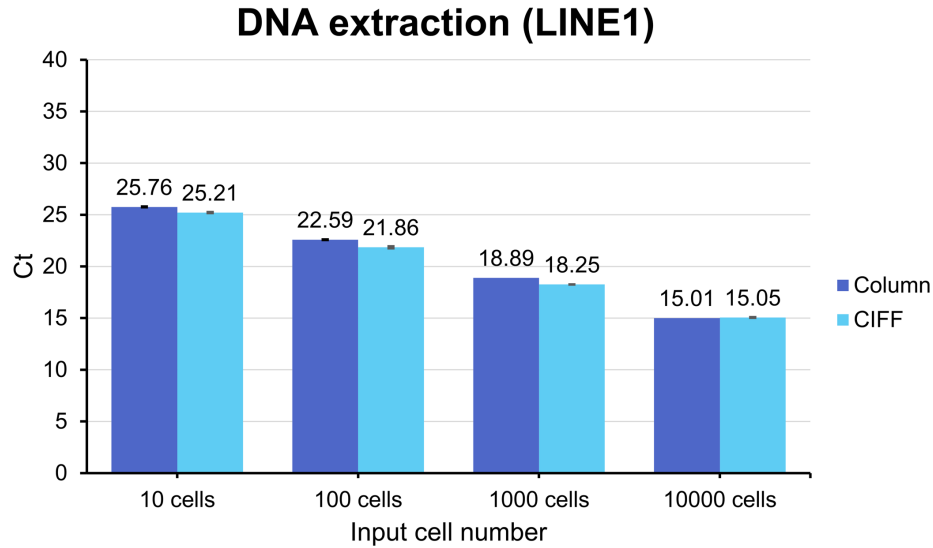

**Figure S2.** DNA extraction efficiency of CIFF compared to a traditional column-based technique for low input samples. qPCR performance of LINE1 DNA extracted from 10 to 10,000 LNCaP cells using CIFF compared to a traditional column-based technique (Qiagen QIAamp DNA Mini Kit).

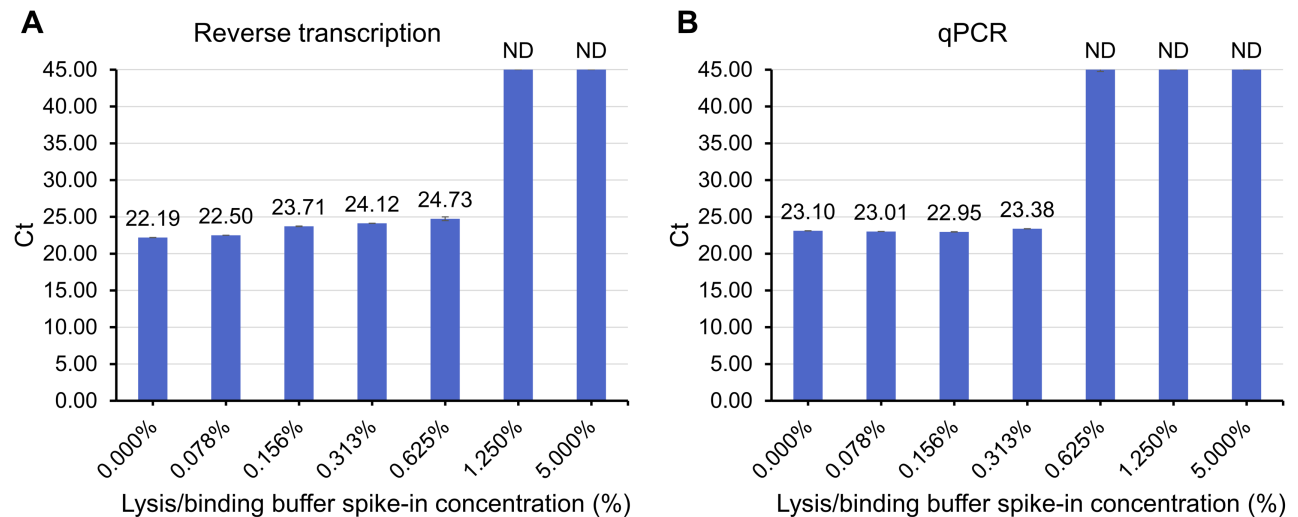

**Figure S3.** Inhibition of reverse transcription (A) and quantitative PCR (B) reactions at various concentrations of mRNA Lysis/Binding buffer (100 mM Tris-HCl (pH 7.5), 500 mM LiCl, 10 mM EDTA, 1% LiDS, 5 mM dithiothreitol (DTT)) contamination in the reaction.

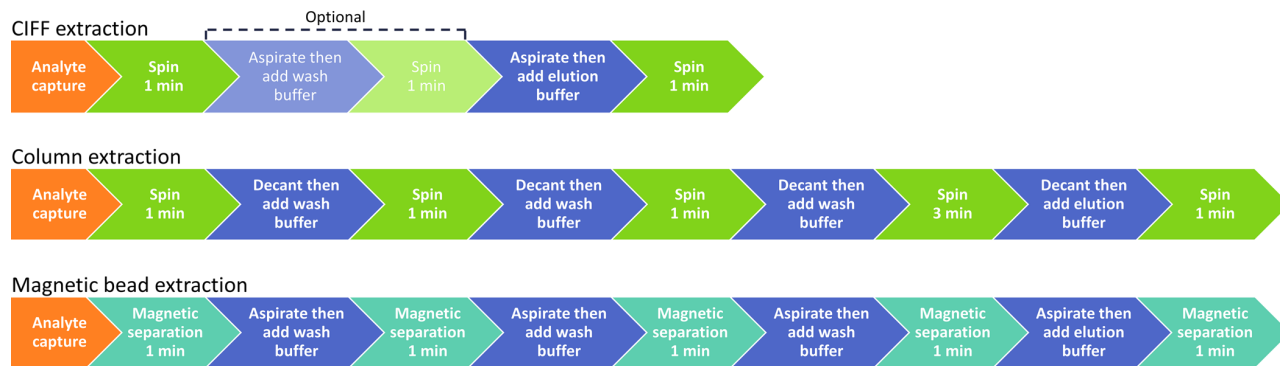

**Figure S4.** Comparison of operation workflow of CIFF extraction, column-based extraction, and magnetic bead-based extraction.

## References:

- (1) Li, C.; Yu, J.; Schehr, J.; Berry, S. M.; Leal, T. A.; Lang, J. M.; Beebe, D. J. Exclusive Liquid Repellency: An Open Multi-Liquid-Phase Technology for Rare Cell Culture and Single-Cell Processing. *ACS Appl. Mater. Interfaces* **2018**, *10* (20), 17065–17070.
